# Supplementary material for: Lanthanide coordination frameworks constructed from 3,3′,4,4′-diphenylsulfonetetracarboxylic and 1,10-phenanthroline: synthesis, crystal structures and luminescence properties
Source: Royal Society of Chemistry journal article supplement (doi:10.1039/c6dt02646j), 2016-01-01

## Supporting Information

### **Lanthanide coordination frameworks constructed from 3,3',4,4'-diphenylsulfonetetracarboxylic and 1,10-phenanthroline: Synthesis, crystal structures and luminescence properties**

Chuan-Ti Li, Yi-Fan Zhao, Huai-Ming Hu\*, Hui Zhao, Xiaofang Wang, Ganglin Xue

Key Laboratory of Synthetic and Natural Functional Molecule Chemistry of Ministry of Education, College of Chemistry and Materials Science, Northwest University, Xi'an 710127, China

## **Table of Contents:**

1. Selected crystal data and structural refinement parameters (**Table S1**).
2. Selected bond lengths [ $\text{\AA}$ ] and angles [ $^\circ$ ] for compounds **1-12** (**Table S2**).
3. The PXRD patterns for compounds **1-12** (**Figure S1**).
4. The TGA curves of compounds **1-12** (**Figure S2**).
5. Excitation spectra of compounds **2, 4, 11** and **12** (**Figure S3**).
6. Corresponding CIE coordinates of  $\text{Tb}^{3+}$ -doped **2-Eu** with different molar ratios excited at 365 nm (**Table S3**).
7. The CIE coordinates of emissions for the doping molar ratio of  $\text{Tb}^{3+}$  is 70% excited at different wavelengths (**Table S4**).
8. PXRD patterns of **4-Tb** and after immersing in  $\text{Fe}^{3+}$  aqueous solution (**Figure S4**).
9. The UV-vis absorption spectrum of the  $\text{Fe}^{3+}$ ,  $\text{H}_4\text{dpstc}$  and **4-Tb** in 0.01M  $\text{Fe}^{3+}$  aqueous solution (**Figure S5**).

**Table S1.** Selected crystal data and structural refinement parameters.

| Compound                                                                                    | <b>1</b>                                           | <b>2</b>                                            | <b>3</b>                                            | <b>4</b>                                           |
|---------------------------------------------------------------------------------------------|----------------------------------------------------|-----------------------------------------------------|-----------------------------------------------------|----------------------------------------------------|
| Empirical formula                                                                           | C <sub>16</sub> H <sub>7</sub> SmO <sub>13</sub> S | C <sub>16</sub> H <sub>10</sub> EuO <sub>13</sub> S | C <sub>16</sub> H <sub>11</sub> GdO <sub>13</sub> S | C <sub>16</sub> H <sub>6</sub> TbO <sub>13</sub> S |
| Formula weight                                                                              | 589.63                                             | 594.26                                              | 600.56                                              | 597.19                                             |
| Crystal system                                                                              | Triclinic                                          | Triclinic                                           | Triclinic                                           | Triclinic                                          |
| Space group                                                                                 | <i>P-1</i>                                         | <i>P-1</i>                                          | <i>P-1</i>                                          | <i>P-1</i>                                         |
| <i>a</i> (Å)                                                                                | 5.9443(9)                                          | 5.9204(10)                                          | 5.9188(7)                                           | 5.9118(15)                                         |
| <i>b</i> (Å)                                                                                | 13.177(2)                                          | 13.177(2)                                           | 13.1837(16)                                         | 13.215(3)                                          |
| <i>c</i> (Å)                                                                                | 13.687(2)                                          | 13.667(2)                                           | 13.6877(16)                                         | 13.723(4)                                          |
| $\alpha$ (°)                                                                                | 109.604(2)                                         | 109.572(2)                                          | 109.804(2)                                          | 110.088(4)                                         |
| $\beta$ (°)                                                                                 | 95.076(2)                                          | 94.896(2)                                           | 94.954(2)                                           | 94.904(4)                                          |
| $\gamma$ (°)                                                                                | 93.038(2)                                          | 93.260(3)                                           | 93.385(2)                                           | 93.524(4)                                          |
| <i>V</i> (Å <sup>3</sup> )                                                                  | 1002.1(3)                                          | 996.8(3)                                            | 996.7(2)                                            | 998.5(4)                                           |
| <i>Z</i>                                                                                    | 2                                                  | 2                                                   | 2                                                   | 2                                                  |
| $\rho_{\text{calc}}$ (g · cm <sup>-3</sup> )                                                | 1.954                                              | 1.980                                               | 2.001                                               | 1.986                                              |
| <i>F</i> (000)                                                                              | 570                                                | 578                                                 | 582                                                 | 574                                                |
| Reflections collected                                                                       | 4935                                               | 4882                                                | 4912                                                | 4838                                               |
| <i>S</i> on <i>F</i> <sup>2</sup>                                                           | 1.068                                              | 0.0278                                              | 1.037                                               | 0.391                                              |
| <i>R</i> <sub>int</sub>                                                                     | 0.0220                                             | 1.029                                               | 0.0147                                              | 1.158                                              |
| <i>R</i> <sub>1</sub> , <i>wR</i> <sub>2</sub> <sup>a</sup><br>[ <i>I</i> > 2σ( <i>I</i> )] | 0.0351, 0.0970                                     | 0.0394, 0.1066                                      | 0.0263, 0.0721                                      | 0.0783, 0.2164                                     |
| <i>R</i> <sub>1</sub> , <i>wR</i> <sub>2</sub> <sup>a</sup> (all data)                      | 0.0376, 0.0988                                     | 0.0408, 0.1086                                      | 0.0408, 0.1086                                      | 0.0824, 0.2201                                     |
| <i>CCDC</i>                                                                                 | 1489387                                            | 1489388                                             | 1489389                                             | 1489390                                            |
| Compound                                                                                    | <b>5</b>                                           | <b>6</b>                                            | <b>7</b>                                            | <b>8</b>                                           |

|                                                                             |                                                                      |                                                                      |                                                                      |                                                                      |
|-----------------------------------------------------------------------------|----------------------------------------------------------------------|----------------------------------------------------------------------|----------------------------------------------------------------------|----------------------------------------------------------------------|
| empirical formula                                                           | C <sub>16</sub> H <sub>7</sub> DyO <sub>13</sub> S                   | C <sub>16</sub> H <sub>7</sub> HoO <sub>13</sub> S                   | C <sub>16</sub> H <sub>7</sub> ErO <sub>13</sub> S                   | C <sub>16</sub> H <sub>7</sub> YbO <sub>13</sub> S                   |
| formula weight                                                              | 601.78                                                               | 604.21                                                               | 606.54                                                               | 612.32                                                               |
| crystal system                                                              | Triclinic                                                            | Triclinic                                                            | Triclinic                                                            | Triclinic                                                            |
| space group                                                                 | <i>P-1</i>                                                           | <i>P-1</i>                                                           | <i>P-1</i>                                                           | <i>P-1</i>                                                           |
| <i>a</i> (Å)                                                                | 5.8841(9)                                                            | 5.8683(11)                                                           | 5.8366(12)                                                           | 5.9317(12)                                                           |
| <i>b</i> (Å)                                                                | 13.181(2)                                                            | 13.161(3)                                                            | 13.138(3)                                                            | 13.181(3)                                                            |
| <i>c</i> (Å)                                                                | 13.718(2)                                                            | 13.719(3)                                                            | 13.748(3)                                                            | 13.685(3)                                                            |
| $\alpha$ (°)                                                                | 110.236(2)                                                           | 110.324(3)                                                           | 110.348(3)                                                           | 109.756(3)                                                           |
| $\beta$ (°)                                                                 | 94.862(2)                                                            | 94.741(3)                                                            | 94.596(3)                                                            | 95.029(3)                                                            |
| $\gamma$ (°)                                                                | 93.699(2)                                                            | 93.886(3)                                                            | 94.043(3)                                                            | 93.180(3)                                                            |
| <i>V</i> (Å <sup>3</sup> )                                                  | 989.7(3)                                                             | 984.8(3)                                                             | 979.8(4)                                                             | 999.0(3)                                                             |
| <i>Z</i>                                                                    | 2                                                                    | 2                                                                    | 2                                                                    | 2                                                                    |
| $\rho_{\text{calcd}}$ (mg·m <sup>-3</sup> )                                 | 2.019                                                                | 2.038                                                                | 2.056                                                                | 2.036                                                                |
| <i>F</i> (000)                                                              | 578                                                                  | 580                                                                  | 582                                                                  | 586                                                                  |
| Reflections collected                                                       | 4922                                                                 | 4827                                                                 | 4857                                                                 | 4865                                                                 |
| <i>R</i> <sub>(int)</sub>                                                   | 1.039                                                                | 1.166                                                                | 1.033                                                                | 1.047                                                                |
| S on <i>F</i> <sup>2</sup>                                                  | 0.0229                                                               | 0.0351                                                               | 0.0303                                                               | 0.0301                                                               |
| <i>R</i> <sub>1</sub> , w <i>R</i> <sub>2</sub> [ <i>I</i> >2σ( <i>I</i> )] | 0.0327,0.0780                                                        | 0.0566,0.1137                                                        | 0.0424, 0.1147                                                       | 0.047, 0.1222                                                        |
| <i>R</i> <sub>1</sub> , w <i>R</i> <sub>2</sub> (all data)                  | 0.0374,0.0811                                                        | 0.0624,0.1172                                                        | 0.0467, 0.1192                                                       | 0.054, 0.1276                                                        |
| CCDC                                                                        | 1489391                                                              | 1489492                                                              | 1489393                                                              | 1489394                                                              |
| Compound                                                                    | <b>9</b>                                                             | <b>10</b>                                                            | <b>11</b>                                                            | <b>12</b>                                                            |
| empirical formula                                                           | C <sub>28</sub> H <sub>19</sub> PrN <sub>2</sub> O <sub>12.5</sub> S | C <sub>28</sub> H <sub>19</sub> NdN <sub>2</sub> O <sub>12.5</sub> S | C <sub>28</sub> H <sub>19</sub> EuN <sub>2</sub> O <sub>12.5</sub> S | C <sub>28</sub> H <sub>19</sub> TbN <sub>2</sub> O <sub>12.5</sub> S |
| formula weight                                                              | 756.42                                                               | 759.75                                                               | 767.47                                                               | 774.43                                                               |

|                                                                            |                |                |                |                |
|----------------------------------------------------------------------------|----------------|----------------|----------------|----------------|
| crystal system                                                             | Triclinic      | Triclinic      | Triclinic      | Triclinic      |
| space group                                                                | <i>P-1</i>     | <i>P-1</i>     | <i>P-1</i>     | <i>P-1</i>     |
| <i>a</i> (Å)                                                               | 10.5654(17)    | 10.5704(13)    | 10.6041(15)    | 10.6026(13)    |
| <i>b</i> (Å)                                                               | 11.668(2)      | 11.6325(13)    | 11.5157(17)    | 11.5116(14)    |
| <i>c</i> (Å)                                                               | 12.0378(19)    | 12.0347(14)    | 12.0048(17)    | 11.9957(15)    |
| $\alpha$ (°)                                                               | 109.547(3)     | 109.448(2)     | 108.843(2)     | 108.870(2)     |
| $\beta$ (°)                                                                | 105.454(3)     | 105.460(2)     | 105.804(2)     | 105.771(2)     |
| $\gamma$ (°)                                                               | 90.547(3)      | 90.611(2)      | 90.751(2)      | 90.769(2)      |
| <i>V</i> (Å <sup>3</sup> )                                                 | 1339.9(4)      | 1336.8(3)      | 1326.7(3)      | 1325.0(3)      |
| <i>Z</i>                                                                   | 2              | 2              | 2              | 2              |
| $\rho_{\text{calcd}}$ (mg·m <sup>-3</sup> )                                | 1.875          | 1.887          | 1.921          | 1.941          |
| <i>F</i> (000)                                                             | 752            | 754            | 760            | 764            |
| Reflections collected                                                      | 4661           | 4659           | 4619           | 4626           |
| <i>R</i> <sub>(int)</sub>                                                  | 1.046          | 1.095          | 0.0279         | 0.0212         |
| S on <i>F</i> <sup>2</sup>                                                 | 0.0409         | 0.0201         | 1.002          | 1.017          |
| <i>R</i> <sub>1</sub> , <i>wR</i> <sub>2</sub> [ <i>I</i> >2σ( <i>I</i> )] | 0.0578, 0.1090 | 0.0353, 0.0743 | 0.0329, 0.0642 | 0.0316, 0.0700 |
| <i>R</i> <sub>1</sub> , <i>wR</i> <sub>2</sub> (all data)                  | 0.0697, 0.1145 | 0.0389, 0.0762 | 0.0329, 0.0674 | 0.0384, 0.0742 |
| CCDC                                                                       | 1489395        | 1489396        | 1489397        | 1489398        |

$$^aR_1 = \frac{\sum ||F_o| - |F_c||}{\sum |F_o|}, wR_2 = \left[ \frac{\sum w(F_o^2 - F_c^2)^2}{\sum w(F_o^2)^2} \right]^{1/2}$$

**Table S2.** Selected bond lengths [Å] and angles [°] for compounds **1-12**.

| Compound 1          |            |                     |            |
|---------------------|------------|---------------------|------------|
| Sm(1)-O(2)#1        | 2.391(4)   | Sm(1)-O(11)         | 2.414(4)   |
| Sm(1)-O(12)         | 2.439(4)   | Sm(1)-O(3)#2        | 2.455(4)   |
| Sm(1)-O(4)#2        | 2.455(4)   | Sm(1)-O(6)#3        | 2.475(4)   |
| Sm(1)-O(1)          | 2.481(4)   | Sm(1)-O(5)#3        | 2.515(4)   |
| Sm(1)-O(2)          | 2.687(4)   |                     |            |
|                     |            |                     |            |
| O(2)#1-Sm(1)-O(12)  | 86.43(15)  | O(2)#1-Sm(1)-O(3)#2 | 79.99(15)  |
| O(12)-Sm(1)-O(3)#2  | 127.49(14) | O(2)#1-Sm(1)-O(4)#2 | 80.64(15)  |
| O(12)-Sm(1)-O(4)#2  | 74.60(15)  | O(3)#2-Sm(1)-O(4)#2 | 53.28(13)  |
| O(2)#1-Sm(1)-O(6)#3 | 154.30(15) | O(12)-Sm(1)-O(6)#3  | 92.97(16)  |
| O(3)#2-Sm(1)-O(6)#3 | 80.07(15)  | O(4)#2-Sm(1)-O(6)#3 | 74.46(16)  |
| O(2)#1-Sm(1)-O(1)   | 114.17(14) | O(12)-Sm(1)-O(1)    | 148.30(16) |
| O(3)#2-Sm(1)-O(1)   | 81.51(14)  | O(4)#2-Sm(1)-O(1)   | 130.19(15) |
| O(6)#3-Sm(1)-O(1)   | 78.55(15)  | O(2)#1-Sm(1)-O(5)#3 | 151.78(14) |
| O(12)-Sm(1)-O(5)#3  | 80.67(15)  | O(3)#2-Sm(1)-O(5)#3 | 127.52(14) |
| O(4)#2-Sm(1)-O(5)#3 | 119.19(15) | O(6)#3-Sm(1)-O(5)#3 | 52.21(14)  |
| O(1)-Sm(1)-O(5)#3   | 69.95(14)  | O(2)#1-Sm(1)-O(2)   | 64.29(15)  |
| O(12)-Sm(1)-O(2)    | 140.94(14) | O(3)#2-Sm(1)-O(2)   | 74.59(13)  |
| O(4)#2-Sm(1)-O(2)   | 121.40(14) | O(6)#3-Sm(1)-O(2)   | 124.73(15) |
| O(1)-Sm(1)-O(2)     | 49.91(13)  | O(5)#3-Sm(1)-O(2)   | 112.79(13) |
| O(1)#1-Sm(1)-O(11)  | 78.29(16)  | O(11)-Sm(1)-O(3)#2  | 145.05(16) |
| O(11)-Sm(1)-O(5)#3  | 74.49(16)  | O(11)-Sm(1)-O(12)   | 77.71(16)  |
| O(11)-Sm(1)-O(6)#3  | 127.01(16) | O(11)-Sm(1)-O(2)    | 83.26(17)  |
| Compound 2          |            |                     |            |
| Eu(1)-O(1)#1        | 2.378(4)   | Eu(1)-O(11)         | 2.398(4)   |

|                     |            |                     |            |
|---------------------|------------|---------------------|------------|
| Eu(1)-O(12)         | 2.416(4)   | Eu(1)-O(3)#2        | 2.433(4)   |
| Eu(1)-O(4)#2        | 2.448(4)   | Eu(1)-O(6)#3        | 2.460(4)   |
| Eu(1)-O(2)          | 2.467(4)   | Eu(1)-O(5)#3        | 2.502(4)   |
| Eu(1)-O(1)          | 2.682(4)   |                     |            |
|                     |            |                     |            |
| O(1)#1-Eu(1)-O(11)  | 78.29(16)  | O(1)#1-Eu(1)-O(12)  | 86.65(15)  |
| O(11)-Eu(1)-O(12)   | 77.71(16)  | O(1)#1-Eu(1)-O(3)#2 | 79.64(14)  |
| O(11)-Eu(1)-O(3)#2  | 145.05(16) | O(12)-Eu(1)-O(3)#2  | 127.55(14) |
| O(1)#1-Eu(1)-O(4)#2 | 80.68(15)  | O(11)-Eu(1)-O(4)#2  | 145.84(17) |
| O(12)-Eu(1)-O(4)#2  | 74.46(14)  | O(3)#2-Eu(1)-O(4)#2 | 53.51(13)  |
| O(1)#1-Eu(1)-O(6)#3 | 154.11(14) | O(11)-Eu(1)-O(6)#3  | 127.01(16) |
| O(12)-Eu(1)-O(6)#3  | 93.33(16)  | O(3)#2-Eu(1)-O(6)#3 | 79.93(14)  |
| O(4)#2-Eu(1)-O(6)#3 | 74.42(15)  | O(1)#1-Eu(1)-O(2)   | 113.86(13) |
| O(11)-Eu(1)-O(2)    | 83.26(17)  | O(12)-Eu(1)-O(2)    | 148.52(15) |
| O(3)#2-Eu(1)-O(2)   | 81.30(14)  | O(4)#2-Eu(1)-O(2)   | 130.16(14) |
| O(6)#3-Eu(1)-O(2)   | 78.38(15)  | O(1)#1-Eu(1)-O(5)#3 | 151.80(13) |
| O(11)-Eu(1)-O(5)#3  | 74.49(16)  | O(12)-Eu(1)-O(5)#3  | 80.51(15)  |
| O(3)#2-Eu(1)-O(5)#3 | 127.84(14) | O(4)#2-Eu(1)-O(5)#3 | 119.11(15) |
| O(6)#3-Eu(1)-O(5)#3 | 52.54(13)  | O(2)-Eu(1)-O(5)#3   | 70.29(14)  |
| O(1)#1-Eu(1)-O(1)   | 63.92(14)  | O(11)-Eu(1)-O(1)    | 71.76(15)  |
| O(12)-Eu(1)-O(1)    | 140.89(14) | O(3)#2-Eu(1)-O(1)   | 74.29(13)  |
| Compound 3          |            |                     |            |
| Gd(1)-O(1)#1        | 2.367(3)   | Gd(1)-O(11)         | 2.375(4)   |
| Gd(1)-O(12)         | 2.403(3)   | Gd(1)-O(3)#2        | 2.430(3)   |
| Gd(1)-O(4)#2        | 2.437(3)   | Gd(1)-O(2)          | 2.451(3)   |
| Gd(1)-O(5)#3        | 2.454(3)   | Gd(1)-O(6)#3        | 2.497(3)   |
| Gd(1)-O(1)          | 2.682(3)   |                     |            |
|                     |            |                     |            |
| O(1)#1-Gd(1)-O(11)  | 77.70(13)  | O(1)#1-Gd(1)-O(12)  | 86.47(13)  |
| O(11)-Gd(1)-O(12)   | 77.23(13)  | O(1)#1-Gd(1)-O(3)#2 | 79.86(12)  |

|                     |            |                     |            |
|---------------------|------------|---------------------|------------|
| O(11)-Gd(1)-O(3)#2  | 145.10(12) | O(12)-Gd(1)-O(3)#2  | 127.63(12) |
| O(1)#1-Gd(1)-O(4)#2 | 80.75(12)  | O(11)-Gd(1)-O(4)#2  | 145.03(14) |
| O(12)-Gd(1)-O(4)#2  | 74.24(12)  | O(3)#2-Gd(1)-O(4)#2 | 53.80(11)  |
| O(1)#1-Gd(1)-O(2)   | 114.04(11) | O(11)-Gd(1)-O(2)    | 83.80(14)  |
| O(12)-Gd(1)-O(2)    | 148.39(12) | O(3)#2-Gd(1)-O(2)   | 81.35(11)  |
| O(4)#2-Gd(1)-O(2)   | 130.46(12) | O(1)#1-Gd(1)-O(5)#3 | 154.27(12) |
| O(11)-Gd(1)-O(5)#3  | 127.34(13) | O(12)-Gd(1)-O(5)#3  | 93.25(13)  |
| O(3)#2-Gd(1)-O(5)#3 | 80.02(12)  | O(4)#2-Gd(1)-O(5)#3 | 74.45(13)  |
| O(2)-Gd(1)-O(5)#3   | 78.41(12)  | O(1)#1-Gd(1)-O(6)#3 | 151.43(11) |
| O(11)-Gd(1)-O(6)#3  | 74.73(13)  | O(12)-Gd(1)-O(6)#3  | 80.33(13)  |
| O(3)#2-Gd(1)-O(6)#3 | 128.02(11) | O(4)#2-Gd(1)-O(6)#3 | 119.05(12) |
| O(2)-Gd(1)-O(6)#3   | 70.34(11)  | O(5)#3-Gd(1)-O(6)#3 | 52.62(11)  |
| O(1)#1-Gd(1)-O(1)   | 63.97(12)  | O(11)-Gd(1)-O(1)    | 71.98(12)  |
| O(12)-Gd(1)-O(1)    | 140.83(11) | O(3)#2-Gd(1)-O(1)   | 74.25(10)  |
| O(4)#2-Gd(1)-O(1)   | 121.49(11) | O(2)-Gd(1)-O(1)     | 50.10(10)  |
| O(5)#3-Gd(1)-O(1)   | 124.66(12) | O(6)#3-Gd(1)-O(1)   | 113.22(11) |
| Compound 4          |            |                     |            |
| Tb(1)-O(2)#1        | 2.341(10)  | Tb(1)-O(11)         | 2.385(10)  |
| Tb(1)-O(12)         | 2.404(11)  | Tb(1)-O(3)#2        | 2.425(10)  |
| Tb(1)-O(6)#3        | 2.434(11)  | Tb(1)-O(1)          | 2.439(10)  |
| Tb(1)-O(4)#2        | 2.441(10)  | Tb(1)-O(5)#3        | 2.475(11)  |
| Tb(1)-O(2)          | 2.717(10)  |                     |            |
|                     |            |                     |            |
| O(2)#1-Tb(1)-O(11)  | 77.4(4)    | O(2)#1-Tb(1)-O(12)  | 86.2(4)    |
| O(11)-Tb(1)-O(12)   | 76.7(4)    | O(2)#1-Tb(1)-O(3)#2 | 79.5(4)    |
| O(11)-Tb(1)-O(3)#2  | 145.0(4)   | O(12)-Tb(1)-O(3)#2  | 127.5(3)   |
| O(2)#1-Tb(1)-O(6)#3 | 154.1(4)   | O(11)-Tb(1)-O(6)#3  | 127.7(4)   |
| O(12)-Tb(1)-O(6)#3  | 93.5(4)    | O(3)#2-Tb(1)-O(6)#3 | 80.3(4)    |
| O(2)#1-Tb(1)-O(1)   | 113.8(3)   | O(11)-Tb(1)-O(1)    | 84.4(4)    |
| O(12)-Tb(1)-O(1)    | 148.9(4)   | O(3)#2-Tb(1)-O(1)   | 81.3(3)    |



|                     |            |                     |            |
|---------------------|------------|---------------------|------------|
| O(6)#3-Tb(1)-O(1)   | 78.6(4)    | O(2)#1-Tb(1)-O(4)#2 | 80.5(4)    |
| O(11)-Tb(1)-O(4)#2  | 144.2(4)   | O(12)-Tb(1)-O(4)#2  | 73.9(4)    |
| O(3)#2-Tb(1)-O(4)#2 | 54.0(3)    | O(6)#3-Tb(1)-O(4)#2 | 74.6(4)    |
| O(1)-Tb(1)-O(4)#2   | 130.7(3)   | O(2)#1-Tb(1)-O(5)#3 | 151.1(4)   |
| O(11)-Tb(1)-O(5)#3  | 74.6(4)    | O(12)-Tb(1)-O(5)#3  | 80.7(4)    |
| O(3)#2-Tb(1)-O(5)#3 | 128.6(3)   | O(6)#3-Tb(1)-O(5)#3 | 53.1(3)    |
| O(1)-Tb(1)-O(5)#3   | 70.5(4)    | O(4)#2-Tb(1)-O(5)#3 | 119.5(4)   |
| O(2)#1-Tb(1)-O(2)   | 64.0(4)    | O(11)-Tb(1)-O(2)    | 72.1(4)    |
| O(12)-Tb(1)-O(2)    | 140.6(4)   | O(3)#2-Tb(1)-O(2)   | 74.2(3)    |
| O(6)#3-Tb(1)-O(2)   | 124.7(4)   | O(1)-Tb(1)-O(2)     | 49.8(3)    |
| O(4)#2-Tb(1)-O(2)   | 121.7(3)   | O(5)#3-Tb(1)-O(2)   | 112.8(4)   |
| Compound 5          |            |                     |            |
| Dy(1)-O(2)#1        | 2.328(4)   | Dy(1)-O(12)         | 2.362(4)   |
| Dy(1)-O(11)         | 2.372(4)   | Dy(1)-O(3)#2        | 2.399(4)   |
| Dy(1)-O(4)#2        | 2.409(4)   | Dy(1)-O(1)          | 2.419(4)   |
| Dy(1)-O(6)#3        | 2.421(4)   | Dy(1)-O(5)#3        | 2.463(4)   |
| Dy(1)-O(2)          | 2.723(4)   |                     |            |
|                     |            |                     |            |
| O(2)#1-Dy(1)-O(12)  | 77.13(14)  | O(2)#1-Dy(1)-O(11)  | 86.40(15)  |
| O(12)-Dy(1)-O(11)   | 77.19(15)  | O(2)#1-Dy(1)-O(3)#2 | 79.69(14)  |
| O(12)-Dy(1)-O(3)#2  | 144.34(14) | O(11)-Dy(1)-O(3)#2  | 127.94(14) |
| O(2)#1-Dy(1)-O(4)#2 | 80.65(15)  | O(12)-Dy(1)-O(4)#2  | 144.67(15) |
| O(11)-Dy(1)-O(4)#2  | 74.31(14)  | O(3)#2-Dy(1)-O(4)#2 | 54.08(13)  |
| O(2)#1-Dy(1)-O(1)   | 113.68(13) | O(12)-Dy(1)-O(1)    | 83.83(15)  |
| O(11)-Dy(1)-O(1)    | 148.55(15) | O(3)#2-Dy(1)-O(1)   | 81.12(13)  |
| O(4)#2-Dy(1)-O(1)   | 130.61(14) | O(2)#1-Dy(1)-O(6)#3 | 154.23(14) |
| O(12)-Dy(1)-O(6)#3  | 127.98(14) | O(11)-Dy(1)-O(6)#3  | 93.46(16)  |
| O(3)#2-Dy(1)-O(6)#3 | 80.17(14)  | O(4)#2-Dy(1)-O(6)#3 | 74.55(15)  |
| O(1)-Dy(1)-O(6)#3   | 78.69(15)  | O(2)#1-Dy(1)-O(5)#3 | 150.89(14) |
| O(12)-Dy(1)-O(5)#3  | 74.77(14)  | O(11)-Dy(1)-O(5)#3  | 80.16(15)  |

|                     |            |                     |            |
|---------------------|------------|---------------------|------------|
| O(3)#2-Dy(1)-O(5)#3 | 128.67(13) | O(4)#2-Dy(1)-O(5)#3 | 119.53(14) |
| O(1)-Dy(1)-O(5)#3   | 70.70(14)  | O(6)#3-Dy(1)-O(5)#3 | 53.23(13)  |
| O(2)#1-Dy(1)-O(2)   | 63.96(15)  | O(12)-Dy(1)-O(2)    | 71.87(14)  |
| O(11)-Dy(1)-O(2)    | 140.84(13) | O(3)#2-Dy(1)-O(2)   | 73.72(12)  |
| O(4)#2-Dy(1)-O(2)   | 121.27(13) | O(1)-Dy(1)-O(2)     | 49.74(12)  |
| O(6)#3-Dy(1)-O(2)   | 124.48(14) | O(5)#3-Dy(1)-O(2)   | 113.16(13) |
| Compound 6          |            |                     |            |
| Ho(1)-O(2)#1        | 2.325(8)   | Ho(1)-O(11)         | 2.347(8)   |
| Ho(1)-O(12)         | 2.362(7)   | Ho(1)-O(1)          | 2.385(7)   |
| Ho(1)-O(4)#2        | 2.388(8)   | Ho(1)-O(3)#2        | 2.391(8)   |
| Ho(1)-O(5)#3        | 2.414(8)   | Ho(1)-O(6)#3        | 2.443(8)   |
| Ho(1)-O(2)          | 2.736(8)   |                     |            |
|                     |            |                     |            |
| O(2)#1-Ho(1)-O(11)  | 77.3(3)    | O(2)#1-Ho(1)-O(12)  | 86.7(3)    |
| O(11)-Ho(1)-O(12)   | 77.4(3)    | O(2)#1-Ho(1)-O(1)   | 113.5(3)   |
| O(11)-Ho(1)-O(1)    | 83.5(3)    | O(12)-Ho(1)-O(1)    | 148.4(3)   |
| O(2)#1-Ho(1)-O(4)#2 | 80.5(3)    | O(11)-Ho(1)-O(4)#2  | 144.5(3)   |
| O(12)-Ho(1)-O(4)#2  | 73.9(3)    | O(1)-Ho(1)-O(4)#2   | 131.1(3)   |
| O(2)#1-Ho(1)-O(3)#2 | 79.3(3)    | O(11)-Ho(1)-O(3)#2  | 143.7(3)   |
| O(12)-Ho(1)-O(3)#2  | 128.3(2)   | O(1)-Ho(1)-O(3)#2   | 80.9(3)    |
| O(4)#2-Ho(1)-O(3)#2 | 54.8(2)    | O(2)#1-Ho(1)-O(5)#3 | 153.9(3)   |
| O(11)-Ho(1)-O(5)#3  | 128.3(3)   | O(12)-Ho(1)-O(5)#3  | 93.6(3)    |
| O(1)-Ho(1)-O(5)#3   | 78.7(3)    | O(4)#2-Ho(1)-O(5)#3 | 74.6(3)    |
| O(3)#2-Ho(1)-O(5)#3 | 80.1(3)    | O(2)#1-Ho(1)-O(6)#3 | 150.9(3)   |
| O(11)-Ho(1)-O(6)#3  | 74.6(3)    | O(12)-Ho(1)-O(6)#3  | 80.1(3)    |
| O(1)-Ho(1)-O(6)#3   | 70.6(2)    | O(4)#2-Ho(1)-O(6)#3 | 119.7(3)   |
| O(3)#2-Ho(1)-O(6)#3 | 128.9(3)   | O(5)#3-Ho(1)-O(6)#3 | 53.7(3)    |
| O(2)#1-Ho(1)-O(2)   | 64.1(3)    | O(11)-Ho(1)-O(2)    | 71.4(2)    |
| O(12)-Ho(1)-O(2)    | 140.9(3)   | O(1)-Ho(1)-O(2)     | 49.5(2)    |
| O(4)#2-Ho(1)-O(2)   | 121.9(2)   | O(3)#2-Ho(1)-O(2)   | 73.6(2)    |

|                     |            |                     |            |
|---------------------|------------|---------------------|------------|
| O(5)#3-Ho(1)-O(2)   | 124.2(3)   | O(6)#3-Ho(1)-O(2)   | 112.7(2)   |
| Compound 7          |            |                     |            |
| Er(1)-O(1)          | 2.274(5)   | Er(1)-O(11)         | 2.330(6)   |
| Er(1)-O(12)         | 2.340(5)   | Er(1)-O(2)#1        | 2.371(5)   |
| Er(1)-O(5)#2        | 2.385(6)   | Er(1)-O(3)#3        | 2.387(5)   |
| Er(1)-O(4)#3        | 2.391(6)   | Er(1)-O(6)#2        | 2.449(5)   |
| Er(1)-O(1)#1        | 2.820(6)   |                     |            |
|                     |            |                     |            |
| O(1)-Er(1)-O(11)    | 77.0(2)    | O(1)-Er(1)-O(12)    | 86.2(2)    |
| O(11)-Er(1)-O(12)   | 77.7(2)    | O(1)-Er(1)-O(2)#1   | 112.96(19) |
| O(11)-Er(1)-O(2)#1  | 83.0(2)    | O(12)-Er(1)-O(2)#1  | 148.9(2)   |
| O(1)-Er(1)-O(5)#2   | 153.9(2)   | O(11)-Er(1)-O(5)#2  | 128.71(19) |
| O(12)-Er(1)-O(5)#2  | 94.1(2)    | O(2)#1-Er(1)-O(5)#2 | 79.2(2)    |
| O(1)-Er(1)-O(3)#3   | 78.94(19)  | O(11)-Er(1)-O(3)#3  | 142.52(19) |
| O(12)-Er(1)-O(3)#3  | 128.69(19) | O(2)#1-Er(1)-O(3)#3 | 80.54(19)  |
| O(5)#2-Er(1)-O(3)#3 | 80.54(18)  | O(1)-Er(1)-O(4)#3   | 80.0(2)    |
| O(11)-Er(1)-O(4)#3  | 144.8(2)   | O(12)-Er(1)-O(4)#3  | 74.42(19)  |
| O(2)#1-Er(1)-O(4)#3 | 131.0(2)   | O(5)#2-Er(1)-O(4)#3 | 74.9(2)    |
| O(3)#3-Er(1)-O(4)#3 | 54.80(18)  | O(1)-Er(1)-O(6)#2   | 151.07(19) |
| O(11)-Er(1)-O(6)#2  | 75.27(18)  | O(12)-Er(1)-O(6)#2  | 80.18(19)  |
| O(2)#1-Er(1)-O(6)#2 | 71.42(18)  | O(5)#2-Er(1)-O(6)#2 | 53.49(17)  |
| O(3)#3-Er(1)-O(6)#2 | 129.16(17) | O(4)#3-Er(1)-O(6)#2 | 119.83(18) |
| Er(1)-O(1)          | 2.274(5)   | Er(1)-O(11)         | 2.330(6)   |
| Er(1)-O(12)         | 2.340(5)   | Er(1)-O(2)#1        | 2.371(5)   |
| Er(1)-O(5)#2        | 2.385(6)   | Er(1)-O(3)#3        | 2.387(5)   |
| Er(1)-O(4)#3        | 2.391(6)   | Er(1)-O(6)#2        | 2.449(5)   |
| Compound 8          |            |                     |            |
| Yb(1)-O(2)#1        | 2.388(6)   | Yb(1)-O(11)         | 2.406(7)   |
| Yb(1)-O(12)         | 2.424(7)   | Yb(1)-O(3)#2        | 2.441(6)   |
| Yb(1)-O(4)#2        | 2.448(6)   | Yb(1)-O(1)          | 2.463(6)   |

|                     |           |                     |            |
|---------------------|-----------|---------------------|------------|
| Yb(1)-O(6)#3        | 2.465(7)  | Yb(1)-O(5)#3        | 2.494(6)   |
| Yb(1)-O(2)          | 2.669(6)  |                     |            |
|                     |           |                     |            |
| O(2)#1-Yb(1)-O(11)  | 78.0(2)   | O(2)#1-Yb(1)-O(12)  | 86.9(2)    |
| O(11)-Yb(1)-O(12)   | 77.0(2)   | O(2)#1-Yb(1)-O(3)#2 | 79.7(2)    |
| O(11)-Yb(1)-O(3)#2  | 145.5(2)  | O(12)-Yb(1)-O(3)#2  | 127.6(2)   |
| O(2)#1-Yb(1)-O(4)#2 | 80.8(2)   | O(11)-Yb(1)-O(4)#2  | 145.3(3)   |
| O(12)-Yb(1)-O(4)#2  | 74.8(2)   | O(3)#2-Yb(1)-O(4)#2 | 53.2(2)    |
| O(2)#1-Yb(1)-O(1)   | 113.8(2)  | O(11)-Yb(1)-O(1)    | 83.4(3)    |
| O(12)-Yb(1)-O(1)    | 147.9(2)  | O(3)#2-Yb(1)-O(1)   | 81.9(2)    |
| O(4)#2-Yb(1)-O(1)   | 130.6(2)  | O(2)#1-Yb(1)-O(6)#3 | 154.1(2)   |
| O(11)-Yb(1)-O(6)#3  | 127.3(2)  | O(12)-Yb(1)-O(6)#3  | 93.1(3)    |
| O(3)#2-Yb(1)-O(6)#3 | 79.8(2)   | O(4)#2-Yb(1)-O(6)#3 | 74.3(2)    |
| O(1)-Yb(1)-O(6)#3   | 78.7(2)   | O(2)#1-Yb(1)-O(5)#3 | 151.8(2)   |
| O(11)-Yb(1)-O(5)#3  | 74.7(2)   | O(12)-Yb(1)-O(5)#3  | 80.4(2)    |
| O(3)#2-Yb(1)-O(5)#3 | 127.7(2)  | O(4)#2-Yb(1)-O(5)#3 | 119.2(2)   |
| O(1)-Yb(1)-O(5)#3   | 69.9(2)   | O(6)#3-Yb(1)-O(5)#3 | 52.6(2)    |
| O(2)#1-Yb(1)-O(2)   | 64.0(2)   | O(11)-Yb(1)-O(2)    | 71.9(2)    |
| O(12)-Yb(1)-O(2)    | 140.8(2)  | O(3)#2-Yb(1)-O(2)   | 74.7(2)    |
| O(4)#2-Yb(1)-O(2)   | 121.6(2)  | O(1)-Yb(1)-O(2)     | 49.8(2)    |
| O(6)#3-Yb(1)-O(2)   | 124.6(2)  | O(5)#3-Yb(1)-O(2)   | 112.7(2)   |
| Compound 9          |           |                     |            |
| Pr(1)-O(8)#1        | 2.367(6)  | Pr(1)-O(7)#2        | 2.404(5)   |
| Pr(1)-O(2)          | 2.502(5)  | Pr(1)-O(3)#3        | 2.529(5)   |
| Pr(1)-O(1)          | 2.536(5)  | Pr(1)-O(11)         | 2.586(6)   |
| Pr(1)-O(4)#3        | 2.639(5)  | Pr(1)-N(2)          | 2.669(6)   |
| Pr(1)-N(1)          | 2.694(6)  |                     |            |
|                     |           |                     |            |
| O(8)#1-Pr(1)-O(7)#2 | 84.54(18) | O(8)#1-Pr(1)-O(2)   | 136.55(18) |
| O(7)#2-Pr(1)-O(2)   | 96.06(17) | O(8)#1-Pr(1)-O(3)#3 | 126.45(18) |

|                     |            |                     |            |
|---------------------|------------|---------------------|------------|
| O(7)#2-Pr(1)-O(3)#3 | 141.07(17) | O(2)-Pr(1)-O(3)#3   | 77.40(16)  |
| O(8)#1-Pr(1)-O(1)   | 87.6(2)    | O(7)#2-Pr(1)-O(1)   | 74.07(18)  |
| O(2)-Pr(1)-O(1)     | 51.70(17)  | O(3)#3-Pr(1)-O(1)   | 123.89(18) |
| O(8)#1-Pr(1)-O(11)  | 80.76(19)  | O(7)#2-Pr(1)-O(11)  | 140.87(18) |
| O(2)-Pr(1)-O(11)    | 71.66(18)  | O(3)#3-Pr(1)-O(11)  | 73.98(18)  |
| O(1)-Pr(1)-O(11)    | 69.29(19)  | O(8)#1-Pr(1)-O(4)#3 | 76.71(18)  |
| O(7)#2-Pr(1)-O(4)#3 | 141.64(17) | O(2)-Pr(1)-O(4)#3   | 120.53(16) |
| O(3)#3-Pr(1)-O(4)#3 | 50.30(16)  | O(1)-Pr(1)-O(4)#3   | 136.85(18) |
| O(11)-Pr(1)-O(4)#3  | 68.64(18)  | O(8)#1-Pr(1)-N(2)   | 143.28(19) |
| O(7)#2-Pr(1)-N(2)   | 72.22(18)  | O(2)-Pr(1)-N(2)     | 75.35(18)  |
| O(3)#3-Pr(1)-N(2)   | 68.98(18)  | O(1)-Pr(1)-N(2)     | 111.7(2)   |
| O(11)-Pr(1)-N(2)    | 134.6(2)   | O(4)#3-Pr(1)-N(2)   | 104.30(18) |
| O(8)#1-Pr(1)-N(1)   | 85.2(2)    | O(7)#2-Pr(1)-N(1)   | 72.50(18)  |
| O(2)-Pr(1)-N(1)     | 136.53(18) | O(3)#3-Pr(1)-N(1)   | 86.03(19)  |
| O(1)-Pr(1)-N(1)     | 146.29(19) | O(11)-Pr(1)-N(1)    | 141.04(19) |
| O(4)#3-Pr(1)-N(1)   | 72.82(18)  | N(2)-Pr(1)-N(1)     | 61.2(2)    |
| Compound 10         |            |                     |            |
| Nd(1)-O(8)#1        | 2.356(3)   | Nd(1)-O(7)#2        | 2.393(3)   |
| Nd(1)-O(2)          | 2.485(3)   | Nd(1)-O(3)#3        | 2.514(3)   |
| Nd(1)-O(1)          | 2.530(3)   | Nd(1)-O(11)         | 2.572(3)   |
| Nd(1)-O(4)#3        | 2.628(3)   | Nd(1)-N(2)          | 2.661(4)   |
| Nd(1)-N(1)          | 2.668(4)   |                     |            |
|                     |            |                     |            |
| O(8)#1-Nd(1)-O(7)#2 | 84.67(12)  | O(8)#1-Nd(1)-O(2)   | 136.96(12) |
| O(7)#2-Nd(1)-O(2)   | 96.46(11)  | O(8)#1-Nd(1)-O(3)#3 | 126.17(12) |
| O(7)#2-Nd(1)-O(3)#3 | 141.19(11) | O(2)-Nd(1)-O(3)#3   | 76.96(10)  |
| O(8)#1-Nd(1)-O(1)   | 87.62(13)  | O(7)#2-Nd(1)-O(1)   | 74.29(11)  |
| O(2)-Nd(1)-O(1)     | 52.18(11)  | O(3)#3-Nd(1)-O(1)   | 123.80(10) |
| O(8)#1-Nd(1)-O(11)  | 80.31(11)  | O(7)#2-Nd(1)-O(11)  | 140.54(12) |
| O(2)-Nd(1)-O(11)    | 71.77(11)  | O(3)#3-Nd(1)-O(11)  | 74.30(11)  |

|                     |            |                     |            |
|---------------------|------------|---------------------|------------|
| O(1)-Nd(1)-O(11)    | 68.84(12)  | O(8)#1-Nd(1)-O(4)#3 | 75.97(12)  |
| O(7)#2-Nd(1)-O(4)#3 | 141.51(11) | O(2)-Nd(1)-O(4)#3   | 120.39(10) |
| O(3)#3-Nd(1)-O(4)#3 | 50.74(10)  | O(1)-Nd(1)-O(4)#3   | 136.26(11) |
| O(11)-Nd(1)-O(4)#3  | 68.56(11)  | O(8)#1-Nd(1)-N(2)   | 143.21(12) |
| O(7)#2-Nd(1)-N(2)   | 72.13(11)  | O(2)-Nd(1)-N(2)     | 75.26(11)  |
| O(3)#3-Nd(1)-N(2)   | 69.20(11)  | O(1)-Nd(1)-N(2)     | 111.95(12) |
| O(11)-Nd(1)-N(2)    | 135.12(12) | O(4)#3-Nd(1)-N(2)   | 104.90(11) |
| O(8)#1-Nd(1)-N(1)   | 84.71(12)  | O(7)#2-Nd(1)-N(1)   | 72.73(12)  |
| O(2)-Nd(1)-N(1)     | 136.82(11) | O(3)#3-Nd(1)-N(1)   | 86.09(12)  |
| O(1)-Nd(1)-N(1)     | 146.67(12) | O(11)-Nd(1)-N(1)    | 140.70(12) |
| O(4)#3-Nd(1)-N(1)   | 72.62(12)  | N(2)-Nd(1)-N(1)     | 61.59(12)  |
| Compound 11         |            |                     |            |
| Eu(1)-O(1)          | 2.320(3)   | Eu(1)-O(2)#1        | 2.348(3)   |
| Eu(1)-O(7)#2        | 2.425(3)   | Eu(1)-O(6)#3        | 2.475(3)   |
| Eu(1)-O(8)#2        | 2.506(3)   | Eu(1)-O(11)         | 2.527(3)   |
| Eu(1)-O(5)#3        | 2.597(3)   | Eu(1)-N(1)          | 2.615(4)   |
| Eu(1)-N(2)          | 2.626(4)   |                     |            |
|                     |            |                     |            |
| O(1)-Eu(1)-O(2)#1   | 84.46(11)  | O(1)-Eu(1)-O(7)#2   | 135.94(11) |
| O(2)#1-Eu(1)-O(7)#2 | 96.30(11)  | O(1)-Eu(1)-O(6)#3   | 126.17(11) |
| O(2)#1-Eu(1)-O(6)#3 | 141.85(10) | O(7)#2-Eu(1)-O(6)#3 | 77.37(10)  |
| O(1)-Eu(1)-O(8)#2   | 85.94(11)  | O(2)#1-Eu(1)-O(8)#2 | 73.72(11)  |
| O(7)#2-Eu(1)-O(8)#2 | 52.86(10)  | O(6)#3-Eu(1)-O(8)#2 | 124.61(10) |
| O(1)-Eu(1)-O(11)    | 79.26(11)  | O(2)#1-Eu(1)-O(11)  | 139.92(11) |
| O(7)#2-Eu(1)-O(11)  | 72.16(11)  | O(6)#3-Eu(1)-O(11)  | 74.50(11)  |
| O(8)#2-Eu(1)-O(11)  | 68.83(12)  | O(1)-Eu(1)-O(5)#3   | 75.65(10)  |
| O(2)#1-Eu(1)-O(5)#3 | 141.19(11) | O(7)#2-Eu(1)-O(5)#3 | 121.17(10) |
| O(6)#3-Eu(1)-O(5)#3 | 51.20(9)   | O(8)#2-Eu(1)-O(5)#3 | 135.90(11) |
| O(11)-Eu(1)-O(5)#3  | 68.54(11)  | O(1)-Eu(1)-N(1)     | 84.83(11)  |
| O(2)#1-Eu(1)-N(1)   | 73.84(11)  | O(7)#2-Eu(1)-N(1)   | 137.82(11) |

|                     |            |                     |            |
|---------------------|------------|---------------------|------------|
| O(6)#3-Eu(1)-N(1)   | 85.81(11)  | O(8)#2-Eu(1)-N(1)   | 146.95(11) |
| O(11)-Eu(1)-N(1)    | 139.48(12) | O(5)#3-Eu(1)-N(1)   | 71.49(11)  |
| O(1)-Eu(1)-N(2)     | 144.13(11) | O(2)#1-Eu(1)-N(2)   | 73.00(11)  |
| O(7)#2-Eu(1)-N(2)   | 75.34(11)  | O(6)#3-Eu(1)-N(2)   | 68.99(11)  |
| O(8)#2-Eu(1)-N(2)   | 112.88(11) | O(11)-Eu(1)-N(2)    | 135.25(11) |
| Compound 12         |            |                     |            |
| Tb(1)-O(5)#1        | 2.315(3)   | Tb(1)-O(6)#2        | 2.346(3)   |
| Tb(1)-O(3)#3        | 2.437(3)   | Tb(1)-O(1)          | 2.474(3)   |
| Tb(1)-O(4)#3        | 2.499(3)   | Tb(1)-O(11)         | 2.535(4)   |
| Tb(1)-O(2)          | 2.597(3)   | Tb(1)-N(2)          | 2.615(4)   |
| Tb(1)-N(1)          | 2.626(4)   |                     |            |
|                     |            |                     |            |
| O(5)#1-Tb(1)-O(6)#2 | 84.14(12)  | O(5)#1-Tb(1)-O(3)#3 | 135.90(11) |
| O(6)#2-Tb(1)-O(3)#3 | 96.49(12)  | O(5)#1-Tb(1)-O(1)   | 126.36(11) |
| O(6)#2-Tb(1)-O(1)   | 141.79(11) | O(3)#3-Tb(1)-O(1)   | 77.46(11)  |
| O(5)#1-Tb(1)-O(4)#3 | 85.88(12)  | O(6)#2-Tb(1)-O(4)#3 | 73.85(12)  |
| O(3)#3-Tb(1)-O(4)#3 | 52.82(10)  | O(1)-Tb(1)-O(4)#3   | 124.70(11) |
| O(5)#1-Tb(1)-O(11)  | 79.39(11)  | O(6)#2-Tb(1)-O(11)  | 139.81(12) |
| O(3)#3-Tb(1)-O(11)  | 72.03(11)  | O(1)-Tb(1)-O(11)    | 74.75(11)  |
| O(4)#3-Tb(1)-O(11)  | 68.64(12)  | O(5)#1-Tb(1)-O(2)   | 75.84(11)  |
| O(6)#2-Tb(1)-O(2)   | 141.14(11) | O(3)#3-Tb(1)-O(2)   | 121.07(10) |
| O(1)-Tb(1)-O(2)     | 51.15(10)  | O(4)#3-Tb(1)-O(2)   | 135.79(12) |
| O(11)-Tb(1)-O(2)    | 68.60(11)  | O(5)#1-Tb(1)-N(2)   | 84.92(12)  |
| O(6)#2-Tb(1)-N(2)   | 73.62(12)  | O(3)#3-Tb(1)-N(2)   | 137.72(11) |
| O(1)-Tb(1)-N(2)     | 85.70(12)  | O(4)#3-Tb(1)-N(2)   | 146.90(12) |
| O(11)-Tb(1)-N(2)    | 139.79(12) | O(2)-Tb(1)-N(2)     | 71.74(12)  |
| O(5)#1-Tb(1)-N(1)   | 144.12(12) | O(6)#2-Tb(1)-N(1)   | 73.09(12)  |
| O(3)#3-Tb(1)-N(1)   | 75.28(11)  | O(1)-Tb(1)-N(1)     | 68.86(11)  |
| O(4)#3-Tb(1)-N(1)   | 112.82(12) | O(11)-Tb(1)-N(1)    | 135.21(11) |
| O(2)-Tb(1)-N(1)     | 105.08(12) | N(2)-Tb(1)-N(1)     | 62.46(12)  |

Symmetry transformations used to generate equivalent atoms: For **1** #1 1-x,1-y,-z; #2 2-x,1-y,-z; #3 2-x,1-y,1-z. For **2** #1 1-x,1-y,-z; #2 2-x,1-y,-z; #3 2-x,1-y,1-z. For **3** #1 1-x,1-y,-z; #2 2-x,1-y,-z; #3 2-x,1-y,1-z. For **4** #1 1-x,1-y,-z; #2 2-x,1-y,-z; #3 2-x,1-y,1-z. For **5** #1 1-x,1-y,-z; #2 2-x,1-y,-z; #3 2-x,1-y,1-z. For **6** #1 1-x,1-y,-z; #2 2-x,1-y,-z; #3 2-x,1-y,1-z. For **7** #1 1-x,1-y,-z; #2 2-x,1-y,-z; #3 2-x,1-y,1-z. For **8** #1 1-x,1-y,-z; #2 2-x,1-y,-z; #3 2-x,1-y,1-z. For **9** #1 1-x,-y,1-z; 1-x,-y,1-z; x,-1+y,-1+z. For **10** #1 1-x,-y,1-z; 1-x,-y,1-z; x,-1+y,-1+z. For **11** #1 1-x,-y,1-z; 1-x,-y,1-z; x,-1+y,-1+z. For **12** #1 1-x,-y,1-z; 1-x,-y,1-z; x,-1+y,-1+z.

**Figure S1.** The PXRD patterns for compounds 1-12.

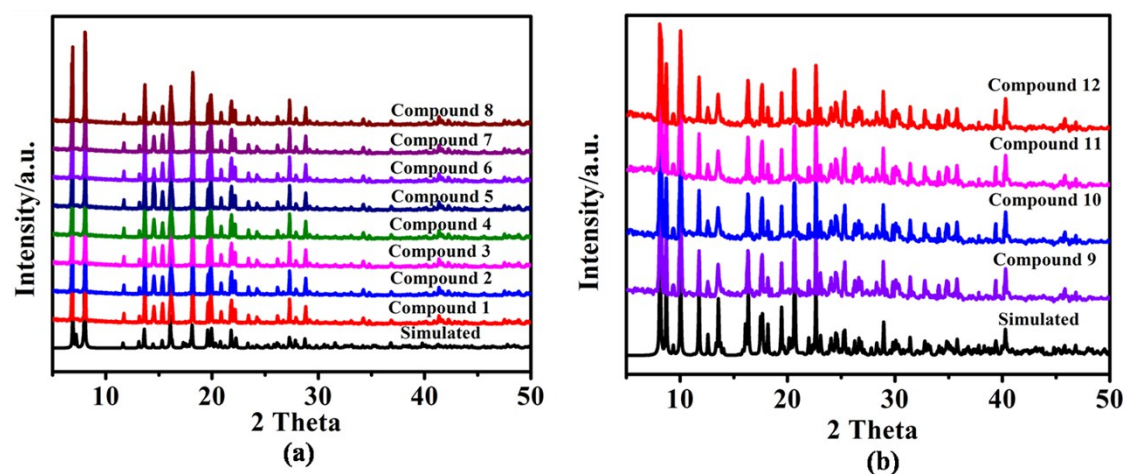

**Figure S2.** The TGA curves of compounds 1-12.

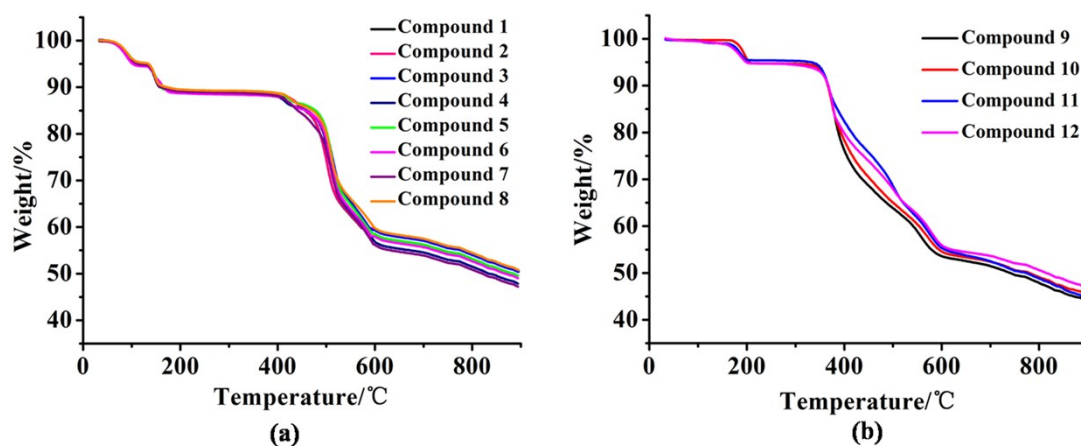



**Figure S3.** Excitation spectra of compounds **2**, **4**, **11** and **12**.

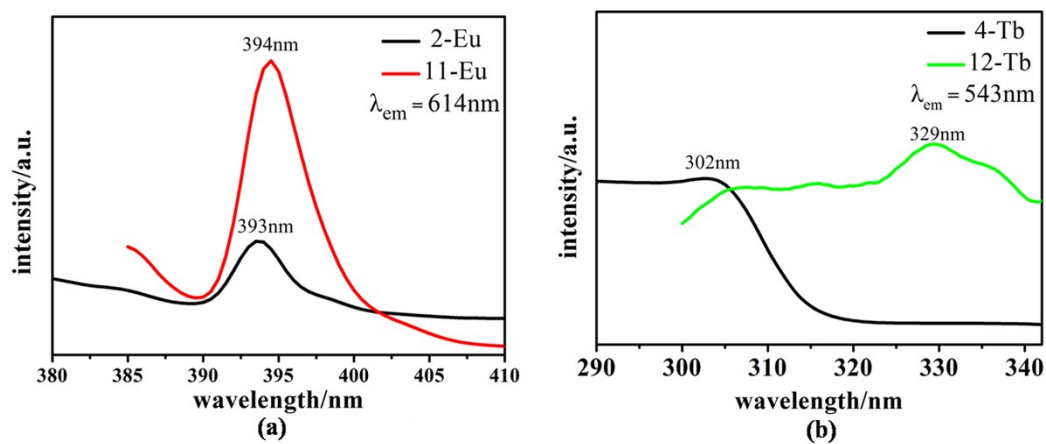

**Table S3.** Corresponding CIE coordinates of Tb<sup>3+</sup>-doped **2-Eu** with different molar

|              |               |               |               |               |               |
|--------------|---------------|---------------|---------------|---------------|---------------|
| Sample       | 10%           | 30%           | 50%           | 60%           | 70%           |
| CIE<br>(x,y) | (0.262,0.534) | (0.266,0.495) | (0.289,0.449) | (0.328,0.414) | (0.358,0.384) |
| Sample       | 80%           | 90%           | 95%           | 98%           |               |
| CIE<br>(x,y) | (0.388,0.363) | (0.402,0.354) | (0.410,0.342) | (0.415,0.325) |               |

ratios excited at 365 nm.

**Table S4.** The CIE coordinates of emissions for the doping molar ratio of  $Tb^{3+}$  is 70% excited at different wavelengths.

| excitation wavelength (nm) | 345           | 365           | 380           | 390           |
|----------------------------|---------------|---------------|---------------|---------------|
| CIE (x,y)                  | (0.362,0.439) | (0.358,0.384) | (0.344,0.369) | (0.332,0.337) |

**Figure S4.** PXRD patterns of 4-Tb and after immersing in  $Fe^{3+}$  aqueous solution.

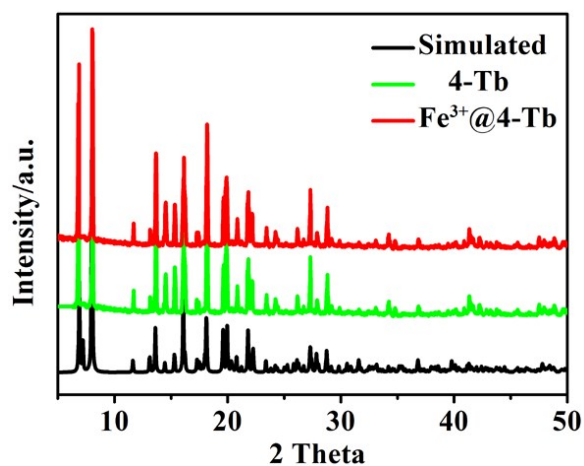

**Figure S5.** The UV-vis absorption spectrum of the  $Fe^{3+}$ ,  $H_4dpstc$  and 4-Tb in 0.01M  $Fe^{3+}$  aqueous solution.

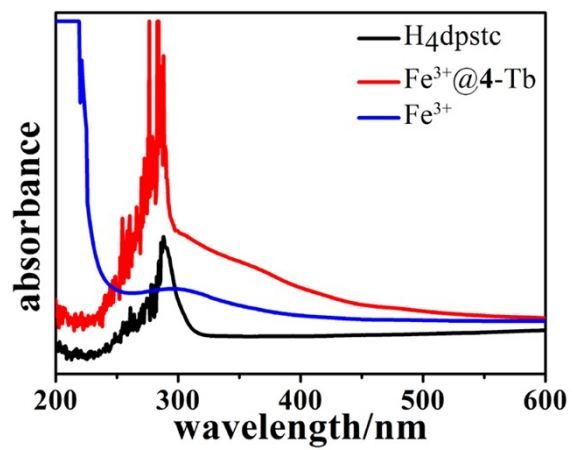

Supplement: c6dt02646j1.pdf [file c6dt02646j1.pdf]
